# Supplementary material for: Resistive non-volatile memories fabricated with poly(vinylidene fluoride)/poly(thiophene) blend nanosheets
Source: Royal Society of Chemistry journal article supplement (doi:10.1039/c8ra01143e), 2018-01-01
Supplement: c8ra01143e1.pdf [file c8ra01143e1.pdf]

## Electronic Supplementary Information

### Resistive Non-Volatile Memories Fabricated with Poly(vinylidene fluoride)/Poly(thiophene) Blend Nanosheets

Huie Zhu,<sup>\*a</sup> Shunsuke Yamamoto,<sup>a</sup> Jun Matsui,<sup>b</sup> Tokuji Miyashita,<sup>a</sup> Masaya Mitsuishi<sup>\*a</sup>

<sup>a</sup> Institute of Multidisciplinary Research for Advanced Materials (IMRAM), Tohoku University, 2-1-1 Katahira, Aoba-ku, Sendai 980-8577, Japan Email: masaya@tohoku.ac.jp

<sup>b</sup> Department of Material and Biological Chemistry, Faculty of Science, Yamagata University, 1-4-12 Kojirakawamachi, Yamagata 990-8560, Japan

#### Materials.

PVDF ( $M_n = 7.1 \times 10^4$ ,  $M_w = 1.8 \times 10^5$ ) was purchased from Aldrich and was reprecipitated once before use. P3CPenT ( $M_w = 5.5\text{--}6.5 \times 10^4$ ) was used as received from Rieke Metals, Inc. pDDA ( $M_n = 3.0 \times 10^4$ ,  $M_w = 8.9 \times 10^4$ ) was synthesized through free radical polymerization initiated by AIBN, referring to a method described in an earlier report.<sup>S1,S2</sup> Solvents including *N*-methyl-2-pyrrolidone (NMP) and chloroform were commercially available and were used without further purification. Octyltrichlorosilane was purchased from Tokyo Chemical Industry Co. Ltd. for the hydrophobic treatment of the substrate surface.

#### Procedures of LB deposition.

PVDF in NMP and P3CPenT in NMP (1 mM) were prepared at room temperature. pDDA was dissolved in  $\text{CHCl}_3$  (1 mM). PVDF and pDDA solutions are colorless and transparent. P3CPenT solution shows an orange color. Then, three co-solutions of PVDF and P3CPenT were prepared with different weight ratios of P3CPenT of 6, 9, and 23 wt% (relative to PVDF) by mixing different volumes of the pre-prepared PVDF and P3CPenT solutions in NMP. The pDDA solution and

PVDF-P3CPenT co-solution were then spread successively onto the water surface to form a stable mixed Langmuir film keeping molar mixing ratio of PVDF-P3CPenT:pDDA to be 50:1.<sup>S3</sup> The water was purified using an ultrapure water system ( $>17.5 \text{ M}\Omega \text{ cm}$ , CPW-101; Advantec Toyo Kaisha Ltd.). Experiments to assess the surface pressure ( $\pi$ )-area ( $A$ ) isotherms and preparation of the mixed LB nanofilms were conducted using an automatically controlled Langmuir trough (FSD-220&21; USI Co. Ltd.) at a compression rate of  $14 \text{ cm}^2 \text{ min}^{-1}$  at  $20 \text{ }^\circ\text{C}$ . During deposition, the substrate holder was lifted at a dipping speed of  $10 \text{ mm min}^{-1}$  in both upstrokes and downstrokes. If not otherwise specified, the blend LB monolayers at varying P3CPenT weight percentages were deposited at  $20 \text{ }^\circ\text{C}$  under surface pressure of  $30 \text{ mN m}^{-1}$  and dried under a nitrogen flow.

#### **Device fabrication.**

The memory devices were fabricated with a sandwiched structure of glass substrate/gold (Au)/blend LB nanofilms/aluminum (Al). A bottom Au electrode ( $40\pm 5 \text{ nm}$ ) and top Al electrode ( $30\pm 5 \text{ nm}$ ) with equal areas of  $3 \text{ mm} \times 3 \text{ mm}$  were thermally evaporated through a metal mask at a rate of  $1.0 \text{ \AA s}^{-1}$  onto glass substrates and the surface of the blend nanosheets, respectively. The samples were cooled using liquid nitrogen at  $77 \text{ K}$  during the deposition of top Al electrodes.

## Measurements.

UV-vis absorption spectra were obtained using a UV-vis absorption spectrometer (U-3000; Hitachi Ltd.). The Fourier transform infrared (FT-IR) transmission measurements were conducted at a spectral resolution of  $4\text{ cm}^{-1}$  using FT-IR (FTIR 4200; Jasco Corp.) under a nitrogen atmosphere. Film surface morphologies were investigated using atomic force microscopy (AFM) measurements (SPA-400; Hitachi High-Tech Science Corp.) under a contact mode. A silicon nitride cantilever ( $0.08\text{ N m}^{-1}$  and  $34\text{ kHz}$ , OMCL-TR400PSA-1; Olympus Corp.) was used during measurement. For Kelvin probe force microscopy, the contact mode was firstly carried out to polarize the mixed LB nanofilms on gold electrode under a bias voltage using a conductive Pt-coated silicon cantilever (OMCL-AC240TM-B2; Olympus Corp.). Then, the Kelvin mode (KFM) was used to obtain the polarized potential images using the same cantilever. The X-ray diffraction (XRD) pattern was measured using a diffractometer (D8 Advance; Bruker AXS K.K.) with a Cu-K $\alpha$  radiation source ( $\lambda=0.154\text{ nm}$ ). The morphology and composition of the samples were examined by Hitachi S-3400N Scanning Electron Microscope (SEM) combined with energy dispersive X-ray spectroscopy (EDX). A multifunction synthesizer (WF1946B, NF Corp., Japan) was used to generate the polarization pulse signal with poling width of  $2.5\text{ s}$ . The current density ( $J$ )-voltage ( $V$ ) characteristics of the memory devices were measured using a semiconductor parameter analyzer (4155C; Agilent Technologies Inc.) under a vacuum condition. Substrates such as quartz, silicon wafers, and glass were used respectively for UV-vis, AFM, and  $J$ - $V$  measurements. Their hydrophilic treatment was done using a UV-O $_3$  cleaner after being washed thoroughly using chloroform, acetone, and 2-propanol. Hydrophobic substrates were obtained by immersing the previously described hydrophilic substrates into an octyltrichlorosilane chloroform solution for  $3\text{ hr}$ .

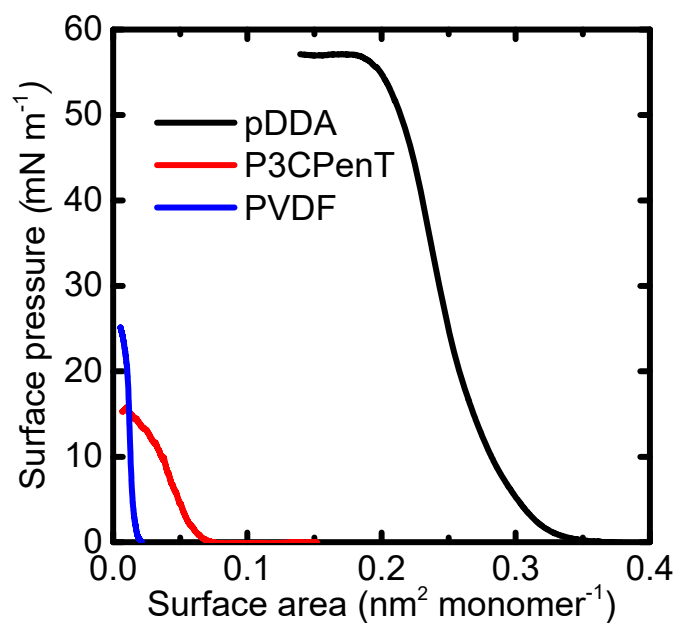

**Figure S1.** (a) Surface pressure ( $\pi$ )-area ( $A$ ) isotherms of pure pDDA, P3CPenT, and PVDF monolayers.

**Table S1. Limiting surface area ( $S_{aver}$ ), collapse surface pressure ( $\pi_c$ ), and the surface pressure ( $\pi^*$ ), occupied area ( $A^*$ ), and modulus ( $C_s^{-1*}$ ) at the concentrated solid state**

| Content of P3CPenT                | 23 wt% | 9 wt%  | 6 wt%  |
|-----------------------------------|--------|--------|--------|
| $S_{aver}$ (nm <sup>2</sup> )     | 0.0250 | 0.0230 | 0.0224 |
| $\pi_c$ (mN m <sup>-1</sup> )     | 51     | 49     | 50     |
| $\pi^*$ (mN m <sup>-1</sup> )     | 30     | 30     | 31     |
| $A^*$ (nm <sup>2</sup> )          | 0.0196 | 0.0183 | 0.0178 |
| $C_s^{-1*}$ (mN m <sup>-1</sup> ) | 123    | 123    | 123    |

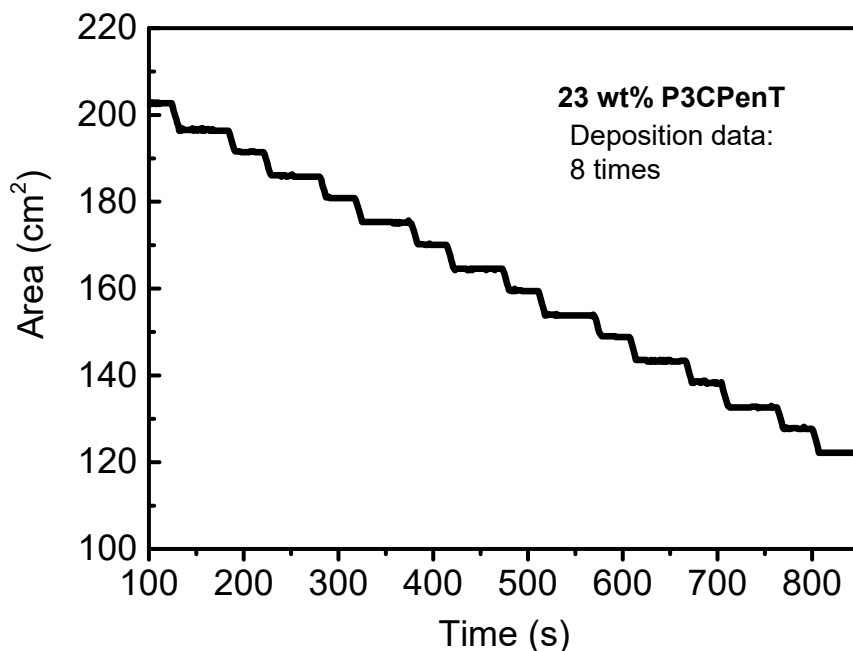

**Figure S2.** Deposition curves of PVDF-P3CPenT-pDDA LB blend nanosheets film at a P3CPenT content of 23 wt%.

The Langmuir films were transferred to substrates with a constant lifting rate of  $10 \text{ mm min}^{-1}$  at  $30 \text{ mN m}^{-1}$  at  $20 \text{ }^\circ\text{C}$ . The reduced area per deposition is uniform, as **Figure S2** shows. The transfer ratio for both downstrokes and upstrokes are calculated as almost unity according to **Equation S1**. Results show that the blend LB nanofilms own very regular layer structures.

$$\text{Transfer ratio } (R) = \text{reduced area } (A_r) \text{ per deposition/ substrate area } (A_s)$$

**(Equation S1)**

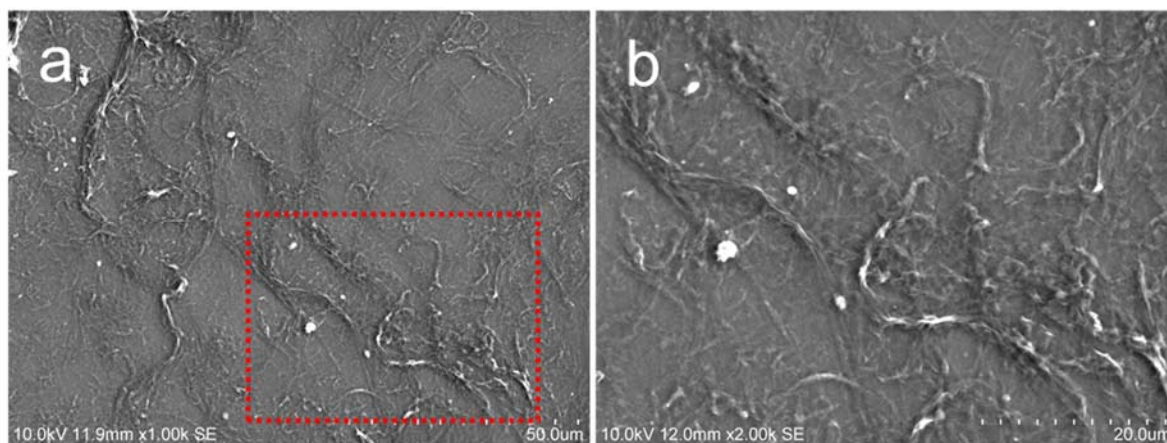

**Figure S3.** SEM images of PVDF-P3CPenT-pDDA LB blend nanosheets at a P3CPenT content of 23 wt%.

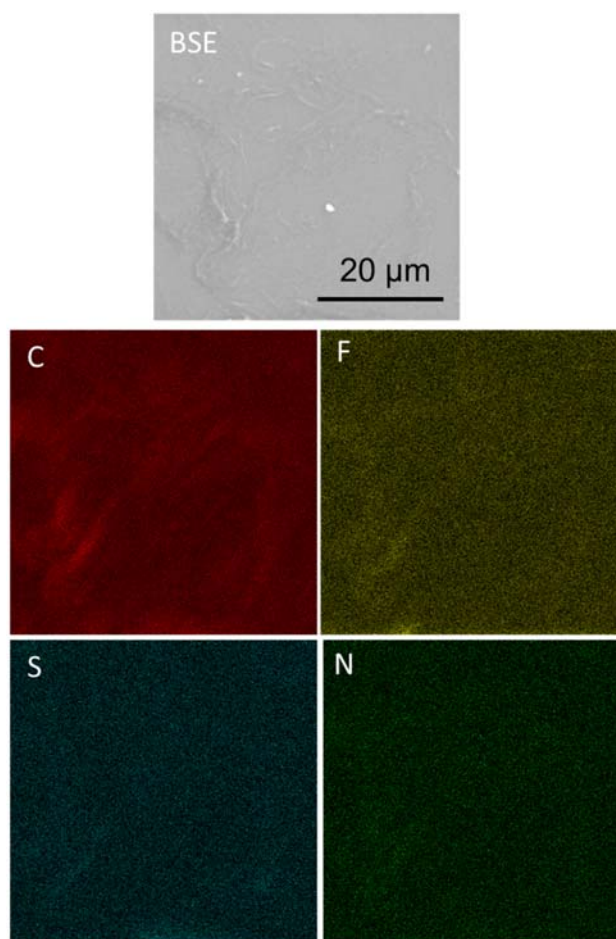

**Figure S4.** SEM image (top), and EDX mappings for elements of C, F, S, and N in PVDF-P3CPenT-pDDA LB blend nanosheets at a P3CPenT content of 23 wt%.

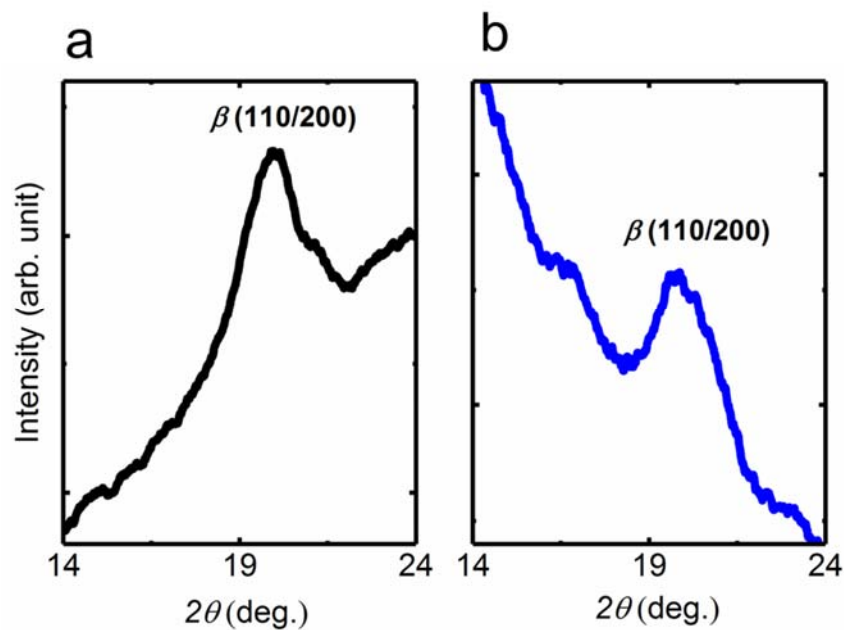

**Figure S5.** XRD spectra of the blend LB nanosheets: (a) PVDF-pDDA (black line) and (b) PVDF-P3CPenT-pDDA at 23 wt% P3CPenT.

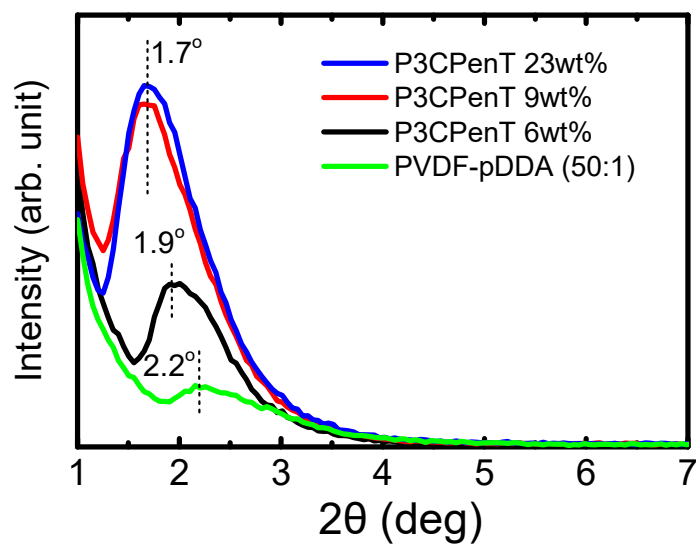

**Figure S6.** XRD spectra of the blend LB nanofilms at different content of P3CPenT: 0 (light green line), 6 (black line), 9 (red line), and 23 wt% (blue line).

$$F(\beta) = \frac{X_\beta}{X_\alpha} = \frac{A_\beta}{\left(\frac{K_\beta}{K_\alpha}\right)A_\alpha + A_\beta} \quad \text{Equation S2}$$

Here,  $A_\alpha$  and  $A_\beta$  are the absorbance at 765 and 840  $\text{cm}^{-1}$ , respectively,  $K_\alpha$  and  $K_\beta$  are the absorption coefficients at the respective wavenumbers of  $6.1 \times 10^4$  and  $7.7 \times 10^4 \text{ cm}^2 \text{ mol}^{-1}$ .<sup>S4</sup>

**Table S2. Monolayer thickness calculated from the Bragg law**

| Monolayer      | pDDA* | PVDF-pDDA<br>(50:1) | P3CPenT<br>6 wt% | P3CPenT<br>9 wt% | P3CPenT<br>23 wt% |
|----------------|-------|---------------------|------------------|------------------|-------------------|
| Thickness (nm) | 1.7   | 2.0                 | 2.3              | 2.6              | 2.6               |

\*value from reference S1

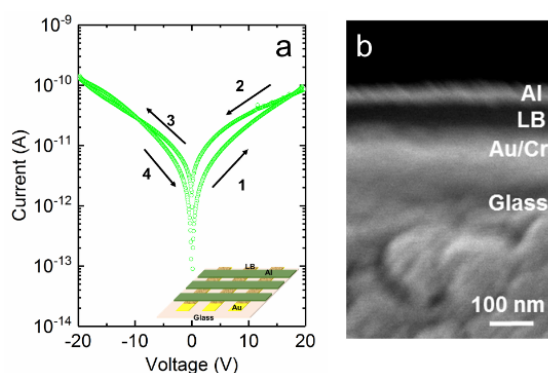

**Fig. S7** (a) Current-voltage characteristic of the blend LB nanosheets (P3CPenT23 wt%, 30 layers, 78 nm). The inset presents the device structure; and (b) Cross-sectional SEM image of the memory device: Al (40 nm)-LB (78 nm)- Cr(3 nm)/Au (42 nm).



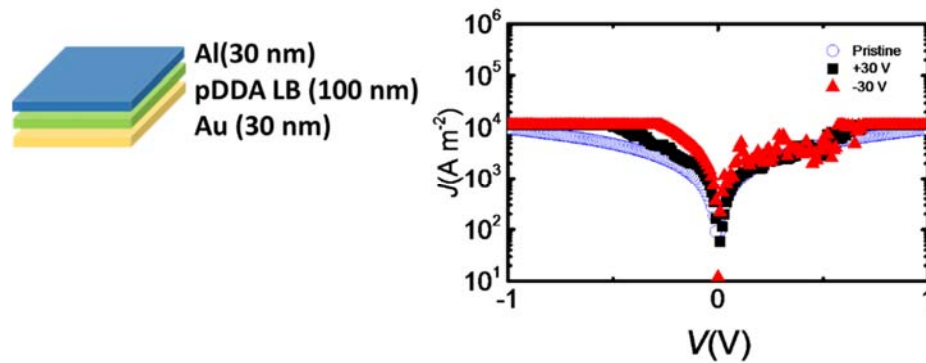

**Figure S8.** Schematic structure of control sample (left), and current density ( $J$ )-voltage ( $V$ ) characteristics of the control sample in pristine and polarization states.

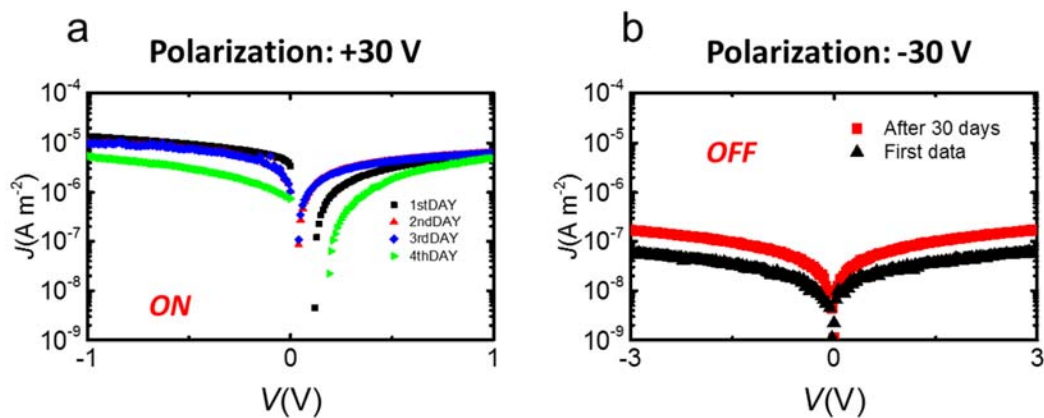

**Figure S9.** Current density ( $J$ )-voltage ( $V$ ) characteristics of the blend LB nanofilms at (a) ON-state and (b) OFF-state varying with time.

## References

- S1 T. Miyashita, Y. Mizuta and M. Matsuda, *Br. Polym. J.*, 1990, **22**, 327-331.
- S2 T. Miyashita, *Prog. Polym. Sci.*, 1993, **18**, 263-294.
- S3 H. Zhu, M. Mitsuishi and T. Miyashita, *Macromolecules*, 2012, **45**, 9076-9084.
- S4 R. Gregorio and M. Cestari, *J. Polym. Sci., Part B: Polym. Phys.*, 1994, **32**, 859-870.
